# Supplementary material
Source: publisher site journal article supplement (https://www.dovepress.com/article/447971)
Supplement: Supplementary file 1 [file get_supplementary_file.php]

**Table S1.** Information of 38 Chinese *S.* Kentucky ST198 strains involved in phylogenomic analysis.

| **Strains** | **Source** | **Location** | **Year** | **Accession no.** | **Reference** |
| --- | --- | --- | --- | --- | --- |
| sc-h43 | Human | Sichuan | 2013 | PRJNA543407 | (1) |
| sc-h42 | Human | Sichuan | 2013 | PRJNA543407 | (1) |
| hn-h4 | Human | Hunan | 2016 | PRJNA543407 | (1) |
| zj-h17 | Human | Zhejiang | 2017 | PRJNA543407 | (1) |
| gx-f4 | Mutton | Guangxi | 2017 | PRJNA543407 | (1) |
| hn-h2 | Human | Hunan | 2017 | PRJNA543407 | (1) |
| gx-f5 | Pork | Guangxi | 2017 | PRJNA543407 | (1) |
| gx-f9 | Duck | Guangxi | 2017 | PRJNA543407 | (1) |
| gx-f7 | Pork | Guangxi | 2017 | PRJNA543407 | (1) |
| hn-f5 | Chicken | Hunan | 2016 | PRJNA543407 | (1) |
| zj-h16 | Human | Zhejiang | 2016 | PRJNA543407 | (1) |
| zj-f82 | Chicken | Zhejiang | 2017 | PRJNA543407 | (1) |
| zj-f100 | Chicken | Zhejiang | 2017 | PRJNA543407 | (1) |
| zj-f94 | Chicken | Zhejiang | 2017 | PRJNA543407 | (1) |
| zj-f78 | Chicken | Zhejiang | 2017 | PRJNA543407 | (1) |
| zj-f95 | Chicken | Zhejiang | 2017 | PRJNA543407 | (1) |
| zj-f72 | Chicken | Zhejiang | 2017 | PRJNA543407 | (1) |
| zj-f79 | Chicken | Zhejiang | 2017 | PRJNA543407 | (1) |
| zj-f75 | Chicken | Zhejiang | 2017 | PRJNA543407 | (1) |
| zj-f87 | Chicken | Zhejiang | 2017 | PRJNA543407 | (1) |
| zj-f77 | Chicken | Zhejiang | 2017 | PRJNA543407 | (1) |
| zj-f50 | Chicken | Zhejiang | 2017 | PRJNA543407 | (1) |
| gx-f8 | Pig liver | Guangxi | 2017 | PRJNA543407 | (1) |
| gx-h1 | Human | Guangxi | 2015 | PRJNA543407 | (1) |
| fj-h1 | Human | Fujian | 2017 | PRJNA543407 | (1) |
| zj-f60 | Chicken | Zhejiang | 2017 | PRJNA543407 | (1) |
| zj-f54 | Chicken | Zhejiang | 2017 | PRJNA543407 | (1) |
| NT-h3189 | Human | Jiangsu | 2021 | PRJNA820366 | (2) |
| AH19MCS1 | drumstick | Anhui | 2019 | PRJNA868865 | (3) |
| AH19MCS13 | chicken | Anhui | 2019 | PRJNA868865 | (3) |
| AH19MCS6 | chicken gizzard | Anhui | 2019 | PRJNA868865 | (3) |
| AH19MCS11 | chicken feet | Anhui | 2019 | PRJNA868865 | (3) |
| AH19MCS9 | drumstick | Anhui | 2019 | PRJNA868865 | (3) |
| AH19MCS8 | chicken | Anhui | 2019 | PRJNA868865 | (3) |
| AH19MCS7 | chicken gizzard | Anhui | 2019 | PRJNA868865 | (3) |
| AH19MCS10 | drumstick | Anhui | 2019 | PRJNA868865 | (3) |
| AH19MCS3 | chicken liver | Anhui | 2019 | PRJNA868865 | (3) |
| AH19MCS12 | chicken feet | Anhui | 2019 | PRJNA868865 | (3) |

**Table S2**. Results of antimicrobial susceptibility test of three *S*. Kentucky in this study.

| **MIC (mg/L)** | **SZ22HS1** | **SZ22HS2** | **SZ22HS3** | **Interpretation** |
| --- | --- | --- | --- | --- |
| Ceftazidime | 32 | 32 | 32 | R |
| Cefepime | 32 | ≥32 | 32 | R |
| Aztreonam | ≥64 | ≥64 | ≥64 | R |
| Ticarcillin/clavulanic acid | 64/2 | 64/2 | 64/2 | I |
| Piperacillin/tazobactam | 8/4 | 8/4 | 8/4 | S |
| Imipenem | ≤0.25 | ≤0.25 | ≤0.25 | S |
| Meropenem | ≤0.25 | ≤0.25 | ≤0.25 | S |
| Ciprofloxacin | ≥4 | ≥4 | ≥4 | R |
| Levofloxacin | ≥8 | ≥8 | ≥8 | R |
| Doxycycline | ≥16 | ≥16 | ≥16 | R |
| Minocycline | ≥16 | ≥16 | ≥16 | R |
| Tigecycline | ≥8 | ≥8 | ≥8 | R |
| Colistin | ≤0.5 | ≤0.5 | ≤0.5 | R |
| Sulfamethoxazole/trimethoprim | ≥4/76 | ≥4/76 | ≥4/76 | R |

R, resistant; I, intermediate; S, susceptible.


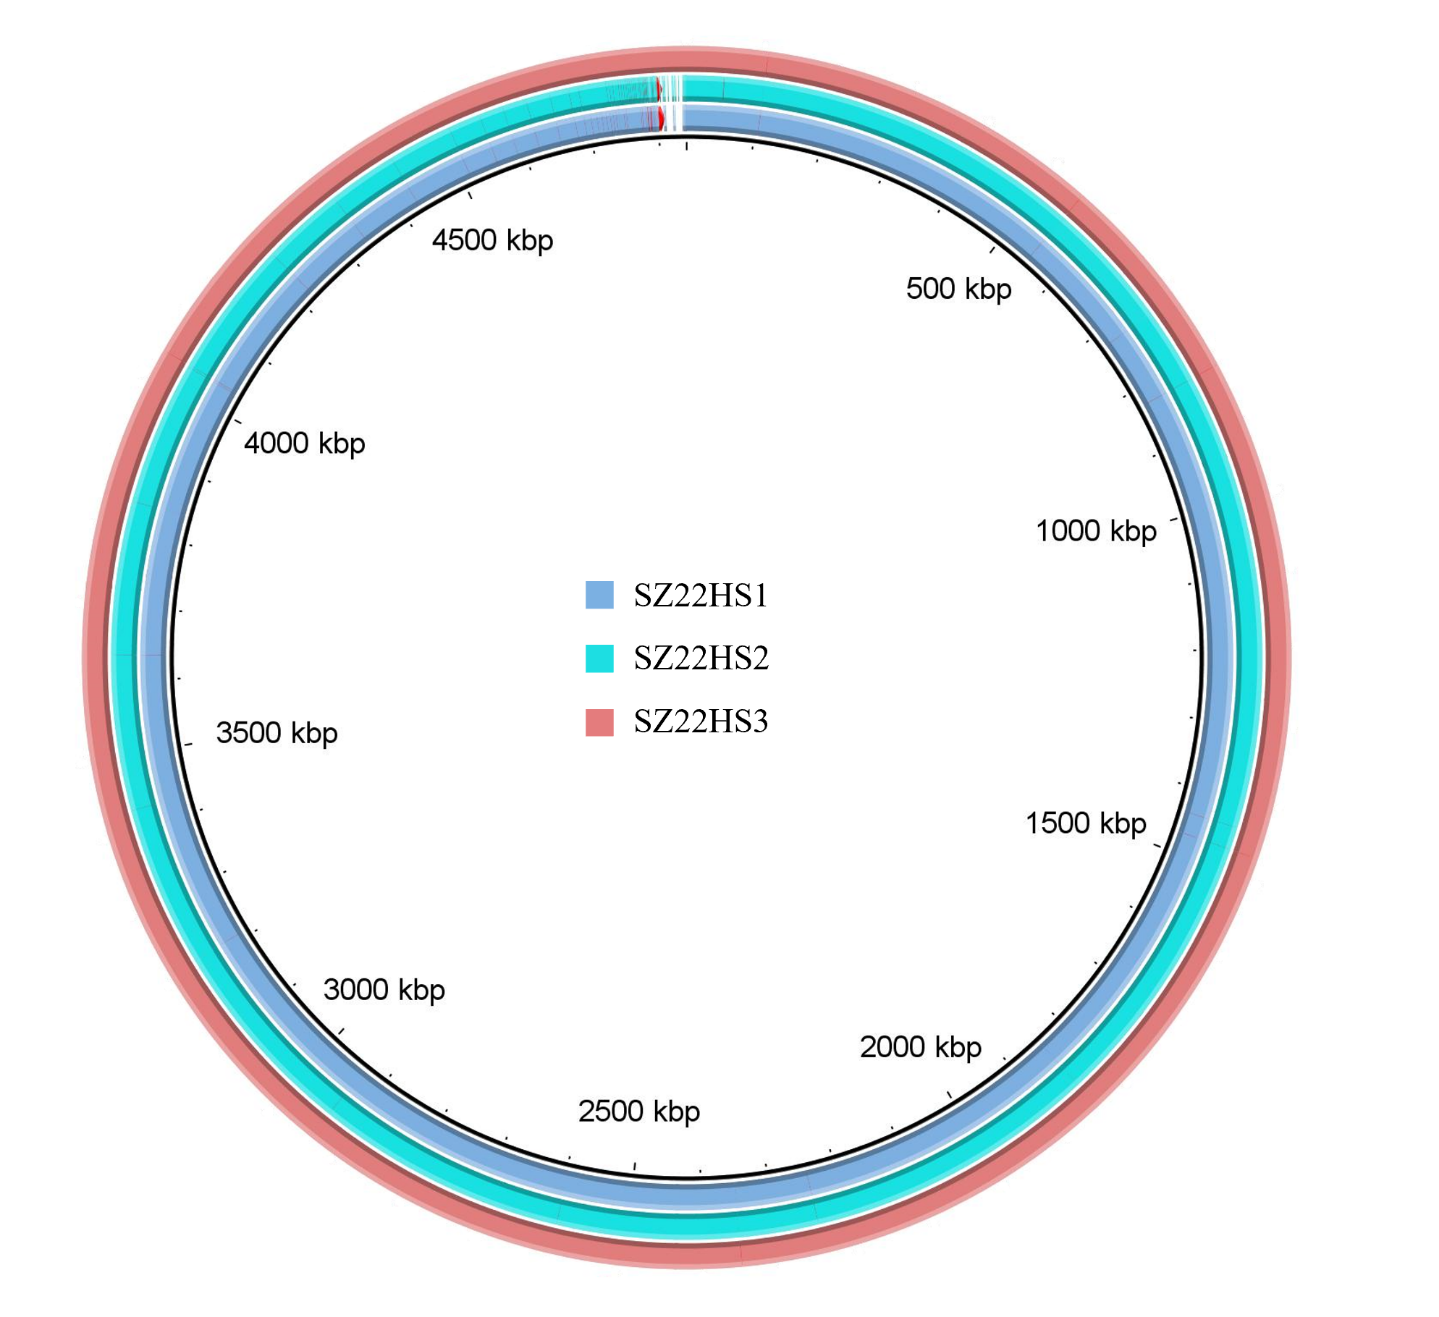
Figure S1. Genome map of *Salmonella enterica* serovar Kentucky strains in this study.

[1] Chen H, Song J, Zeng X, Chen D, Chen R, Qiu C, et al. National prevalence of *Salmonella enterica* serotype Kentucky ST198 with high-level resistance to ciprofloxacin and extended-spectrum cephalosporins in China, 2013 to 2017. mSystems 2021;6:e00935-20. doi:10.1128/mSystems.00935-20.

[2] Xu H, Cao X, Zhang W, Li Q. Co-existence of two ciprofloxacin-resistant *Salmonella enterica* serovar Kentucky strains in the urine of a bladder cancer patient. J Glob Antimicrob Resist. 2022;30:354-6. doi:10.1016/j.jgar.2022.07.011.

[3] Jiang Y, Wang ZY, Li QC, Lu MJ, Wu H, Mei CY, et al. Characterization of extensively drug-resistant *Salmonella enterica* Serovar Kentucky sequence type 198 isolates from chicken meat products in Xuancheng, China. Microbiol Spectr. 2023;11:e0321922. doi:10.1128/spectrum.03219-22.
